# Supplementary material for: In situ X-ray diffraction study of the hydrothermal crystallization of hierarchical Bi2WO6 nanostructures
Source: Royal Society of Chemistry journal article supplement (doi:10.1039/c0nr00340a), 2010-01-01
Supplement: c0nr00340a.pdf [file c0nr00340a.pdf]

## Supporting Information

### In situ X-ray diffraction study of the hydrothermal crystallization of hierarchical $\text{Bi}_2\text{WO}_6$ nanostructures

Ying Zhou, Elena Antonova, Wolfgang Bensch, Greta R. Patzke\*

#### Contents

|                  |                                                                                                                       |    |
|------------------|-----------------------------------------------------------------------------------------------------------------------|----|
| <b>Figure S1</b> | Extent of reaction $\alpha$ vs. time for the (002), (260) and (191) reflections of $\text{Bi}_2\text{WO}_6$ at 160°C. | S2 |
| <b>Figure S2</b> | In situ EDXRD patterns for the formation of $\text{Bi}_2\text{WO}_6$ at 160°C (pH 4.6).                               | S3 |
| <b>Figure S3</b> | Ex situ XRD patterns of the products synthesized at different pH values.                                              | S4 |

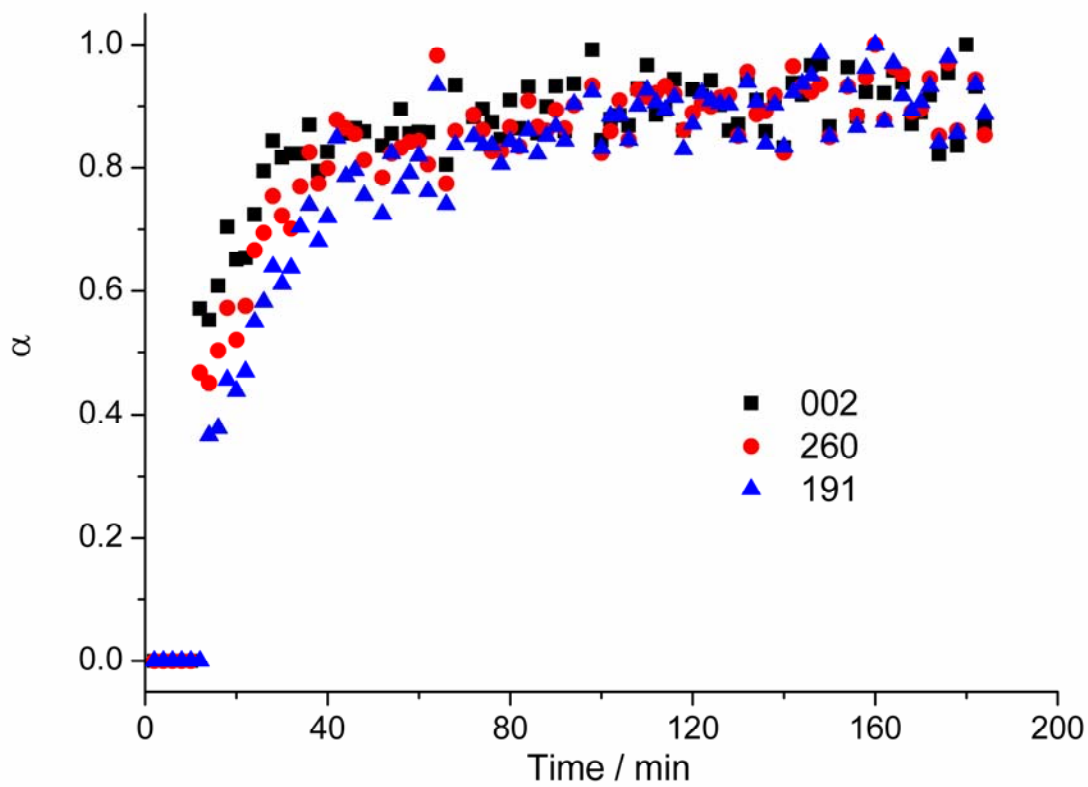

**Figure S1.** Extent of reaction  $\alpha$  vs. time for reflections (002), (260) and (191) of  $\text{Bi}_2\text{WO}_6$  at  $160^\circ\text{C}$ .

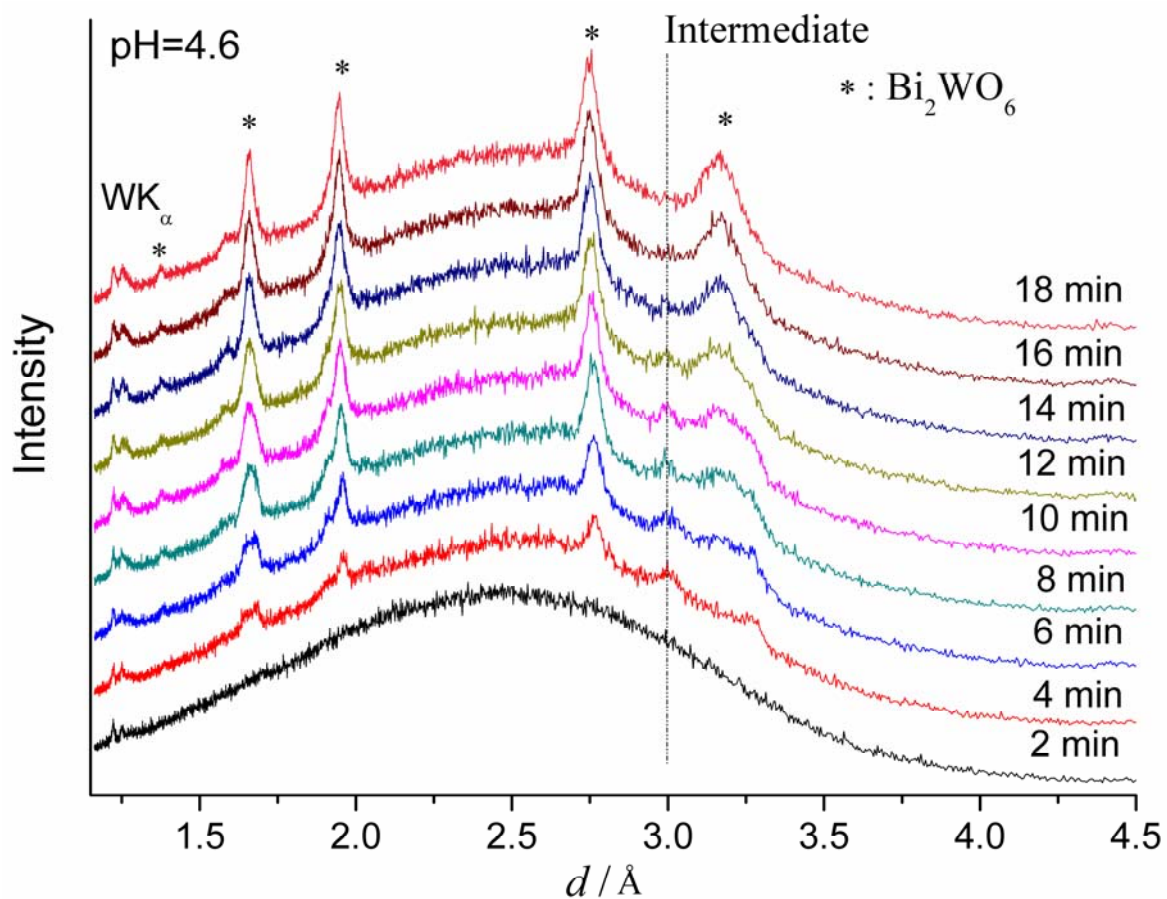

**Figure S2.** In situ EDXRD patterns for the formation of  $\text{Bi}_2\text{WO}_6$  at  $160^\circ\text{C}$  ( $\text{pH } 4.6$ ).

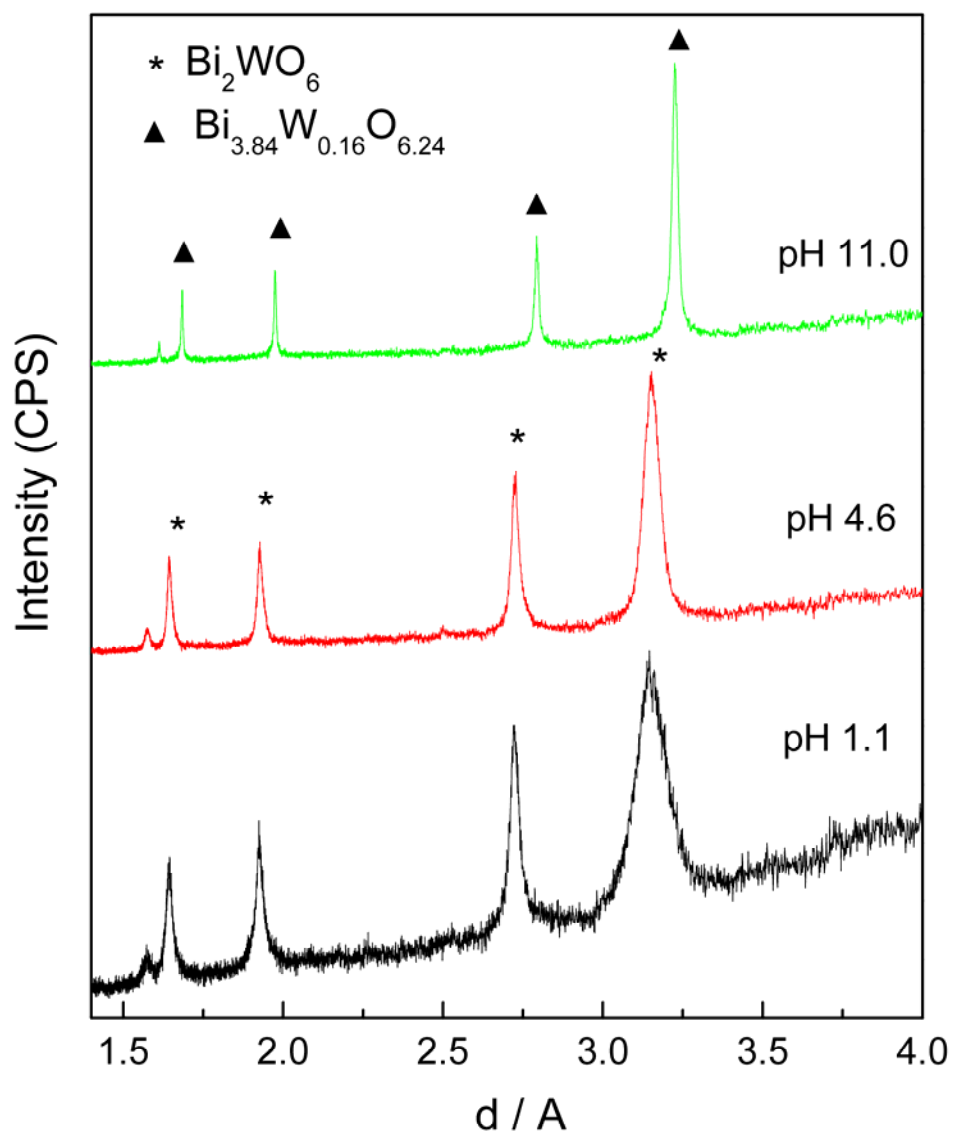

**Figure S3.** Ex situ XRD patterns of the products synthesized at different pH values.
